# Supplementary material for: Human Leukocyte Antigen-Allelic Variations May Influence the Age at Cancer Diagnosis in Lynch Syndrome
Source: Preprints.org preprint supplement (doi:10.20944/preprints202403.0412.v1), 2024-03-07
Supplement: Supplementary file 1 [file supplementary]

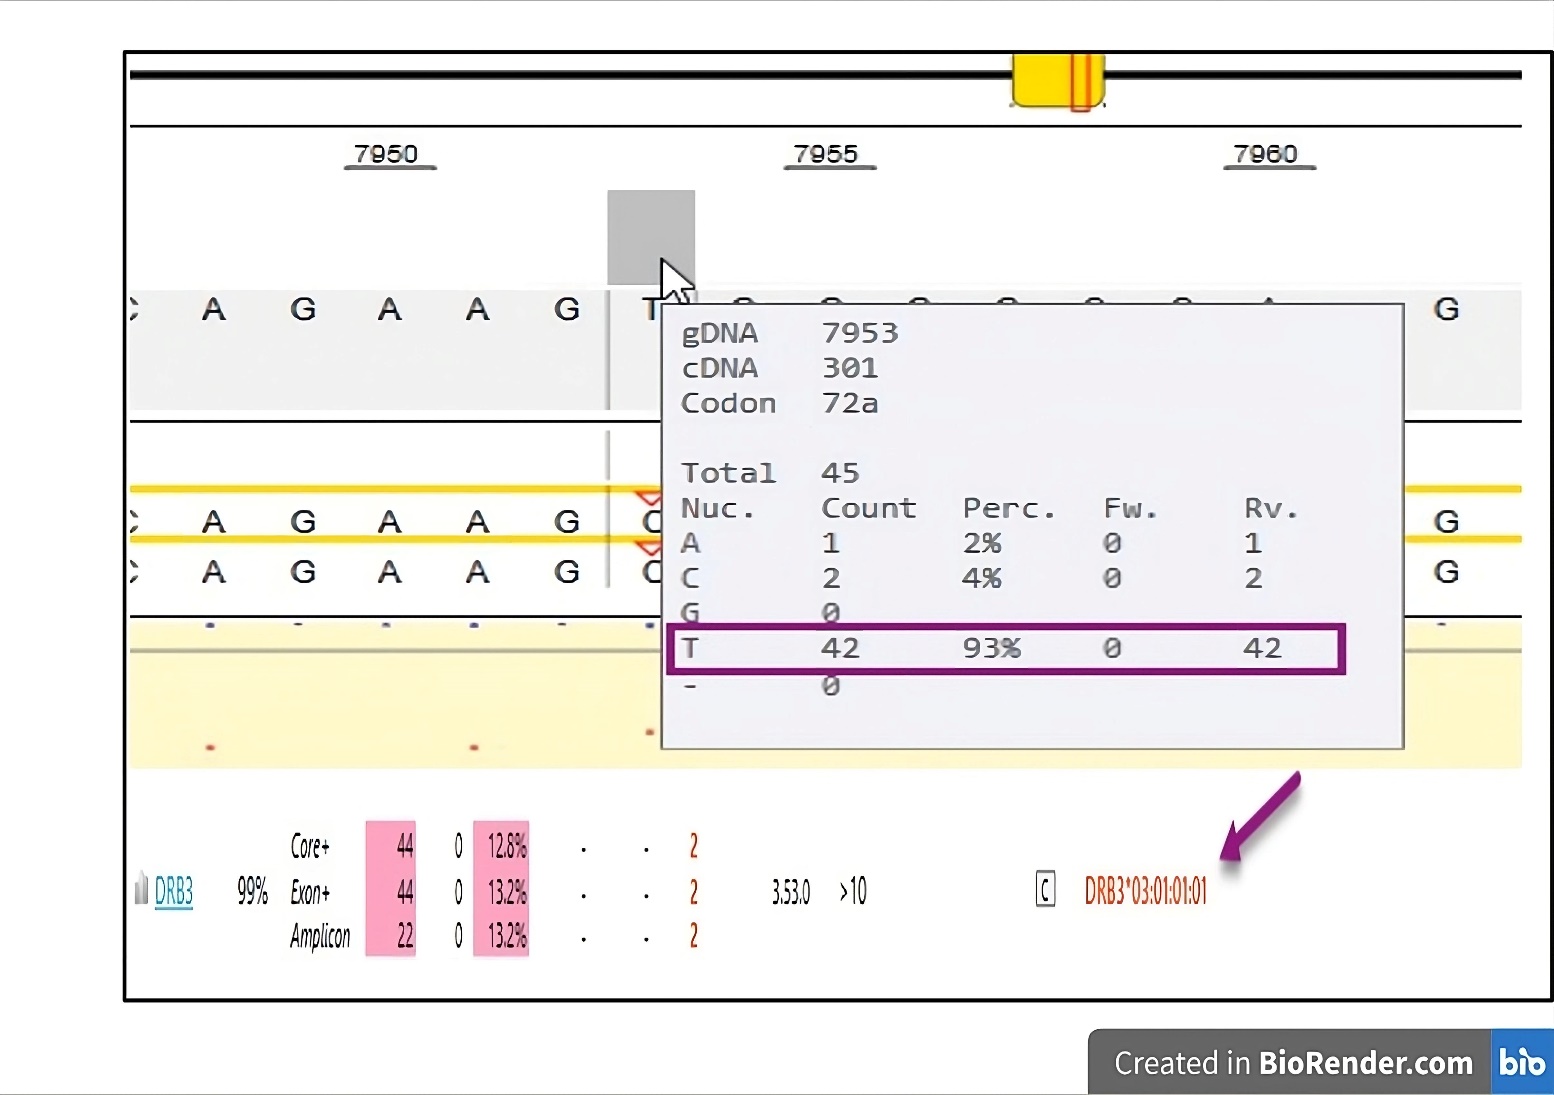


**Supplementary Figure 1:** A snapshot of a potential novel allele in the *HLA* *DRB3* locus. A mismatch was identified in gDNA position 7953. Our sequencing results indicates a T in position 7953 while the closest allele *HLA-DRB3*03:01* has a C at this position. The T is present in 93% of the reads within the second exon of the *HLA* *DRB3* locus, which will result in a change of the amino acid.
